# Supplementary material for: Diagnosis of Aspergillosis in Horses
Source: MDPI journal article supplement (doi:10.3390/jof9020161), 2023-01-25
Supplement: s1 [file s1]

# Diagnosis of Aspergillosis in Horses

**Radim Dobiáš<sup>1,2,\*,†</sup>, Petr Jahn<sup>3†</sup>, Katarina Tóthová<sup>3</sup>, Olga Dobešová<sup>3</sup>, Denisa Višňovská<sup>2,4</sup>, Rutuja Patil<sup>5,6</sup>, Anton Škríba<sup>5</sup>, Pavla Jaworská<sup>1</sup>, Miša Škorič<sup>7</sup>, Libor Podojil<sup>3</sup>, Michaela Kantorová<sup>8</sup>, Jakub Mrázek<sup>8</sup>, Eva Krejčí<sup>1,2</sup>, David A. Stevens<sup>9,10</sup> and Vladimír Havlíček<sup>5,6</sup>**

<sup>1</sup> Department of Bacteriology and Mycology, Public Health Institute in Ostrava, 702 00 Ostrava, Czech Republic

<sup>2</sup> Department of Biomedical Sciences, Faculty of Medicine, University of Ostrava, 703 00 Ostrava, Czech Republic

<sup>3</sup> Equine Clinic, University of Veterinary Sciences, 612 42 Brno, Czech Republic

<sup>4</sup> Department of Biology and Ecology, Faculty of Science, University of Ostrava, 710 00 Ostrava, Czech Republic

<sup>5</sup> Institute of Microbiology of the Czech Academy of Sciences, 142 20 Prague, Czech Republic

<sup>6</sup> Department of Analytical Chemistry, Faculty of Science, Palacký University, 771 46 Olomouc, Czech Republic

<sup>7</sup> Department of Pathology and Parasitology, University of Veterinary Sciences Brno, 612 42 Brno, Czech Republic

<sup>8</sup> Department of Molecular Biology, Public Health Institute in Ostrava, 702 00 Ostrava, Czech Republic

<sup>9</sup> California Institute for Medical Research, San Jose, CA 95128, USA

<sup>10</sup> Division of Infectious Diseases and Geographic Medicine, Stanford University School of Medicine, Stanford, CA 95128, USA

\* Correspondence: radim.dobias@seznam.cz

**Supplementary Table S1: Review of previously reported cases of invasive pulmonary aspergillosis in horses.**

| Country                         | No. of cases in the study | No. of cases/Breed                                                                               | Age                | Sex                                | Causative agent                                                   | Underlying condition                                                                                                                                                                                                                    | Diagnosis                         | Outcome                                                                    | Reference                     |
|---------------------------------|---------------------------|--------------------------------------------------------------------------------------------------|--------------------|------------------------------------|-------------------------------------------------------------------|-----------------------------------------------------------------------------------------------------------------------------------------------------------------------------------------------------------------------------------------|-----------------------------------|----------------------------------------------------------------------------|-------------------------------|
| Canada                          | 1                         | 1 SB                                                                                             | 20 years           | Mare                               | <i>Aspergillus fumigatus</i>                                      | Hepatopathy susp.                                                                                                                                                                                                                       | PM                                | death                                                                      | Long et Mitchel 1971          |
| USA (N.Y.)                      | 1                         | 1 SB                                                                                             | 2 years            | Filly                              | <i>Aspergillus</i> spp.                                           | Myelomonocytic leukemia                                                                                                                                                                                                                 | PM                                | euthanasia                                                                 | Blue et al. 1987              |
| USA (Florida)                   | 1                         | 1 QH                                                                                             | 7 months           | Colt                               | <i>Aspergillus fumigatus</i>                                      | Diarrhea, laminitis, bacterial uveitis                                                                                                                                                                                                  | PM                                | death                                                                      | Green et al. 1987             |
| USA (Michigan, N.Y.), Australia | 19                        | (5 TB, 4 QH, 2 Arabian, 2 Appaloosa, 2 Grade, 1 Saddlebred, 1 Palomino, 1 Standardbred, 1 Welsh) | 1 month – 15 years | (Stallions 8, Mares 8, Geldings 3) | <i>Aspergillus</i> spp. (2 of them <i>Aspergillus fumigatus</i> ) | (Diarrhea – 14, Pneumonia – 3, Umbilical hernia repair – 1, Laminitis – 3, Septicemia – 1, Obstructive urolithiasis – 1, Myelogenous leukemia – 1, Anemia and ataxia – 1, Corticosteroid treatment – 3)                                 | PM                                | death/ euthanasia                                                          | Slocombe et Slauson 1988      |
| USA (Pennsylvania)              | 1                         | 1 QH                                                                                             | 8 years            | Mare                               | <i>Aspergillus</i> spp.                                           | Enteritis/colitis                                                                                                                                                                                                                       | PM                                | death                                                                      | Hattel et al. 1991            |
| USA (Ohio)                      | 1                         | 1 National Show Horse                                                                            | 4 years            | Gelding                            | <i>Aspergillus</i> spp.                                           | <i>Streptococcus zooepidemicus</i> Infection                                                                                                                                                                                            | IV susp.                          | euthanasia                                                                 | Moore et al. 1993             |
| USA (Missouri)                  | 1                         | 1 QH                                                                                             | 7 years            | Gelding                            | <i>Aspergillus</i> spp.                                           | Large colon volvulus (surgery), diarrhea                                                                                                                                                                                                | PM                                | euthanasia                                                                 | Pace et al. 1994              |
| USA (Michigan)                  | 1                         | 1 TB x QH                                                                                        | 11 years           | Gelding                            | <i>Aspergillus</i> spp.                                           | Myelomonocytic leukemia                                                                                                                                                                                                                 | PM                                | death                                                                      | Buechner-Maxwell et al. 1994  |
| Spain                           | 1                         | 1 French Saddlebred                                                                              | 30 years           | Mare                               | <i>Aspergillus fumigatus</i>                                      | Cushing syndrome                                                                                                                                                                                                                        | PM                                | euthanasia                                                                 | Carrasco et al. 1996          |
| USA (Michigan)                  | 1                         | 1 QH                                                                                             | 6 years            | Mare                               | <i>Aspergillus</i> spp.                                           | Enterocolitis                                                                                                                                                                                                                           | IV susp.                          | death                                                                      | Rosenstein et Mullaney 1996   |
| Spain                           | 1                         | 1 TB                                                                                             | 2 years            |                                    | <i>Aspergillus niger</i>                                          | <i>Rhizopus solonifer</i> pneumonia                                                                                                                                                                                                     | PM                                | death                                                                      | Carrasco et al. 1997          |
| USA (Pennsylvania)              | 29                        | (10 TB, 11 SB, 2 QH, 2 Western, 1 Appaloosa, 1 Saddlebred, 1 Arabian, 1 Pony)                    | 5.0 ± 4.4 years    | (Mare 15, Stallion 7, Gelding 7)   | <i>Aspergillus</i> spp.                                           | [Primary GIT disease – 20, Secondary GIT disease – 5 (diarrhea 12, colic 4, weight loss 2, others 1 each: laryngoplasty, renal failure, sinus surgery, pleuropneumonia, myositis, DIC, toxemia, hepatic failure, ataxia, debilitation)] | IV – 1<br>IV susp. – 1<br>PM - 27 | euthanasia 17<br>death 12                                                  | Sweeney et Habecker 1999      |
| USA (Missouri)                  | 2                         | (1 QH, 1 Arabian)                                                                                | 2 - 14 years       | (Gelding, Stallion)                | <i>Aspergillus</i> spp.                                           | [Ataxia (EPM) Strangulation of small intestine (surgery)]                                                                                                                                                                               | PM<br>PM                          | death<br>death                                                             | Johnson et al. 1999           |
| Iran                            | 1                         | N/A                                                                                              | 7 years            | N/A                                | <i>Aspergillus fumigatus</i>                                      | Purulent pneumonia                                                                                                                                                                                                                      | PM                                | death                                                                      | Tafti et al. 2001             |
| France                          | 1                         | 1 Pony                                                                                           | 6 years            | Mare                               | <i>Aspergillus fumigatus</i>                                      | Colitis, mucormycosis                                                                                                                                                                                                                   | PM                                | death                                                                      | Thirion-Delalande et al. 2005 |
| USA (California)                | 1                         | 1 TB                                                                                             | 14 days            | Colt                               | <i>Aspergillus fumigatus</i>                                      | Diarrhoea (enterocolitis)                                                                                                                                                                                                               | IV                                | healing after surgical resection of lesion and voriconazole administration | Hilton et al. 2009            |
| Brazil                          | 2                         | (1 Brasileiro-de-Hipismo, 1 PH)                                                                  | 1.5 - 3 years      | (Filly 1, Colt 1)                  | <i>Aspergillus fumigatus</i> both horses                          | Both horses: anaemia, apathy, fever, neurological signs, poor body condition                                                                                                                                                            | PM<br>PM                          | death<br>death                                                             | Headley et al. 2014           |

SB, Standardbred; QH, Quarter Horse; TB, Thoroughbred; PH, Paint Horse; PM, postmortem; IV, *in vitro*; susp., suspicious; EPM, equine protozoal myelitis; N/A, not available

**Supplementary Table S2. Calibration curves for gliotoxin and ferricrocin.** Calibration linearity and regression coefficients ( $R^2$ ) are shown in the insets. For quantitation of gliotoxin in bronchoalveolar lavage fluid, the calibration curve (blank, 1, 5, 10, 50, 100, 250 ng/mL) was constructed from  $[M+H]^+$  ion signals (a). The instrumental LOD and LOQ were 2.1 ng/mL and 6.5 ng/mL respectively. The content of gliotoxin in lung tissue homogenate was determined by use of prepared standards (0, 100, 200, 300, 400 ng/mL) (b). Ferricrocin calibration (blank, 1, 5, 10, 50, 100, 250 ng/mL) was plotted using  $[M+H]^+$ ,  $[M+Na]^+$ , and  $[M+K]^+$  ion signals with the instrumental LOD and LOQ, 0.6 ng/mL and 1.9 ng/mL respectively (c).

a

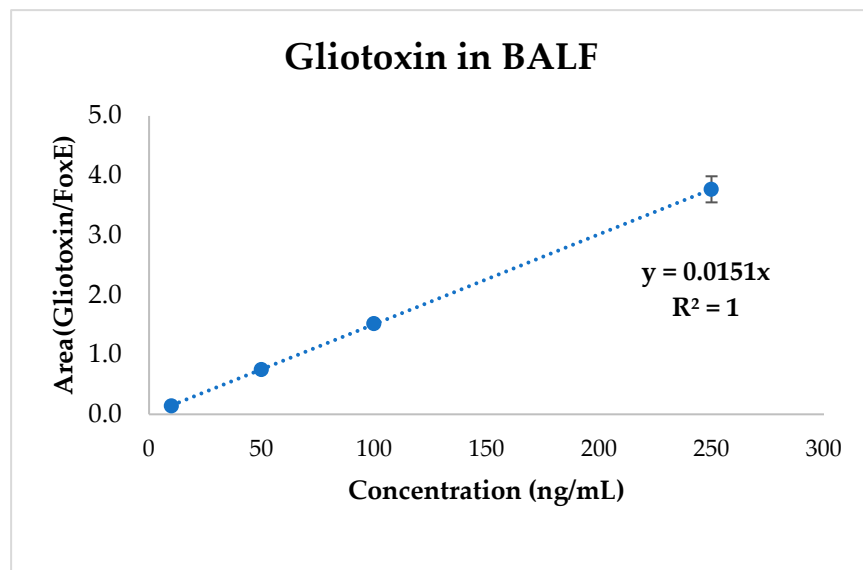

b

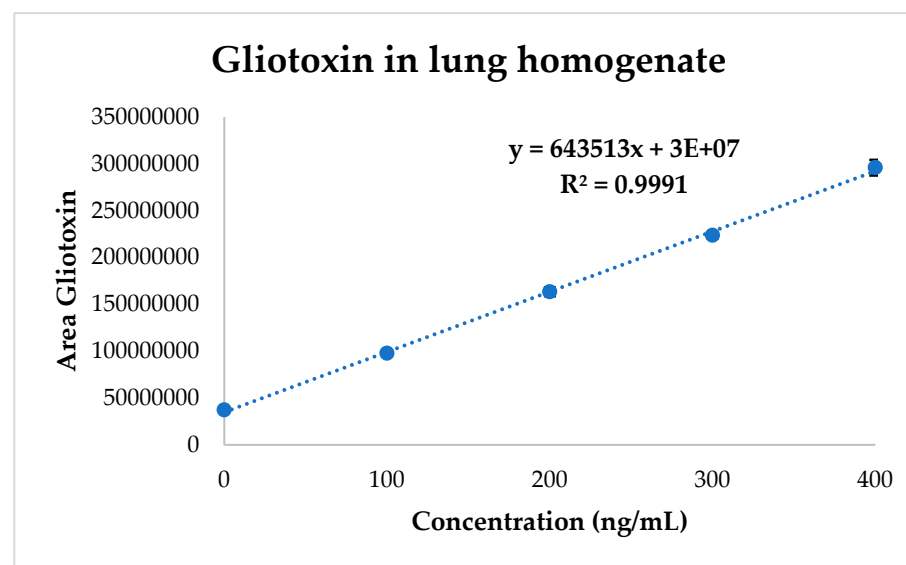

c

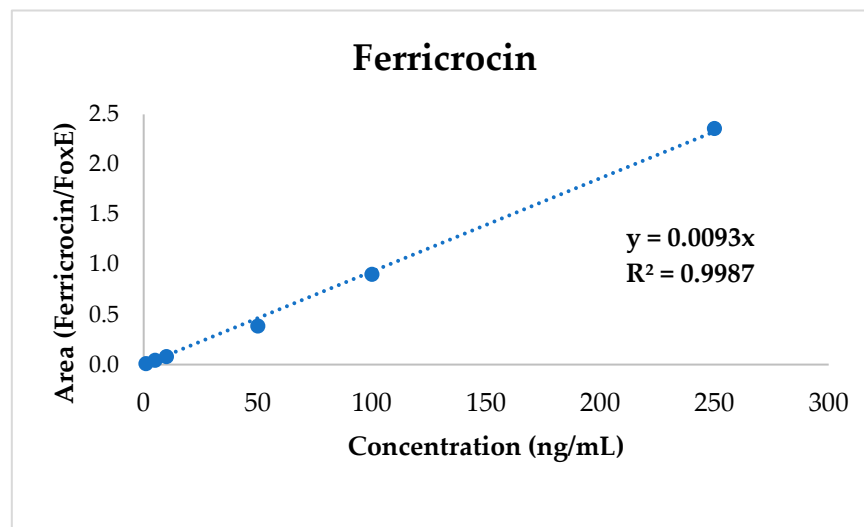

**Supplementary Table S3. Characteristics of horses with underlying pulmonary disease, healthy controls and horse with IPA.** Results of *Aspergillus* spp. detection in tracheal wash and BALF. IPA, invasive pulmonary aspergillosis; EHV5, Equine Herpes Virus 5; BALF, Bronchoalveolar Lavage Fluid. Difference between the severe asthma, moderate asthma, IPA and the healthy control group with regard to the occurrence of *Aspergillus* spp. in BALF and tracheal wash was statistically significant (P<0.05).

|                                                | Total<br>enrolled<br>(n=18) | Severe<br>Asthma<br>(n= 8) | Moderate<br>Asthma<br>(n = 4) | IPA, EHV 5,<br>Colitis,<br>Death<br>(n=1) | Healthy<br>(n=5) |
|------------------------------------------------|-----------------------------|----------------------------|-------------------------------|-------------------------------------------|------------------|
| Age - mean (range)                             | 12 (3-22)                   | 11.9 (9-20)                | 11.5 (8-14)                   | 3 (3)                                     | 10.2 (3-22)      |
| Stallions (%)                                  | 2 (11)                      | 1 (13)                     | 0 (0)                         | 1 (100)                                   | 0 (0)            |
| Mares (%)                                      | 7 (39)                      | 2 (25)                     | 2 (50)                        | 0 (0)                                     | 3 (60)           |
| Geldings (%)                                   | 9 (50)                      | 5 (63)                     | 2 (50)                        | 0 (0)                                     | 2 (40)           |
| <b>Tracheal wash culture:</b>                  |                             |                            |                               |                                           |                  |
| <i>Aspergillus fumigatus</i>                   |                             | 4                          | 1                             | Not sampled                               | 1                |
| <i>Aspergillus montevideensis</i>              |                             | 2                          | 1                             | None                                      | None             |
| <i>Aspergillus flavus</i>                      |                             | 1                          | None                          | None                                      | None             |
| <i>Aspergillus niger</i>                       |                             | 4                          | 1                             | None                                      | None             |
| <i>Aspergillus nidulans</i>                    |                             | 1                          | 1                             | None                                      | None             |
| <i>Aspergillus chevalieri</i>                  |                             | 1                          | None                          | None                                      | None             |
| <b>BALF culture:</b>                           |                             |                            |                               |                                           |                  |
| <i>Aspergillus fumigatus</i>                   |                             | 1                          | 1                             | 1                                         | None             |
| <i>Aspergillus montevideensis</i>              |                             | 3                          | 1                             | None                                      | None             |
| <i>Aspergillus flavus</i>                      |                             | 1                          | None                          | None                                      | None             |
| <i>Aspergillus niger</i>                       |                             | 1                          | None                          | None                                      | None             |
| <i>Aspergillus nidulans</i>                    |                             | None                       | None                          | None                                      | None             |
| <i>Aspergillus chevalieri</i>                  |                             | 1                          | None                          | None                                      | None             |
| <b>Tracheal wash + BALF identical finding:</b> |                             |                            |                               |                                           |                  |
| <i>Aspergillus fumigatus</i>                   |                             | 1                          | 1                             | -                                         | None             |
| <i>Aspergillus montevideensis</i>              |                             | 2                          | 1                             | None                                      | None             |
| <i>Aspergillus flavus</i>                      |                             | None                       | None                          | None                                      | None             |
| <i>Aspergillus niger</i>                       |                             | None                       | None                          | None                                      | None             |
| <i>Aspergillus nidulans</i>                    |                             | None                       | None                          | None                                      | None             |
| <i>Aspergillus chevalieri</i>                  |                             | 1                          | None                          | None                                      | None             |
